# Supplementary material for: A drug targeting only p110α can block phosphoinositide 3-kinase signalling and tumour growth in certain cell types
Source: Oxford University Press journal article supplement (doi:10.1042/bj20110502), 2011-07-04
Supplement: bj4380053add.pdf [file bj4380053add.pdf]

# SUPPLEMENTARY ONLINE DATA

## A drug targeting only p110 $\alpha$ can block phosphoinositide 3-kinase signalling and tumour growth in certain cell types

Stephen JAMIESON\*†, Jack U. FLANAGAN\*†, Sharada KOLEKAR‡, Christina BUCHANAN†‡, Jackie D. KENDALL\*†, Woo-Jeong LEE‡, Gordon W. REWCASTLE\*†, William A. DENNY\*†, Ripudaman SINGH\*, James DICKSON§, Bruce C. BAGULEY\*† and Peter R. SHEPHERD†‡<sup>1</sup>

\*Auckland Cancer Society Research Centre, Faculty of Medical and Health Sciences, University of Auckland, Private Bag 92019, Auckland 1042, New Zealand, †Maurice Wilkins Centre for Molecular Biodiscovery, University of Auckland, Private Bag 92019, Auckland, New Zealand, ‡Department of Molecular Medicine and Pathology, University of Auckland, Medical School, Private Bag 92019, Auckland 1042, New Zealand, and §School of Biological Science, University of Auckland, Private Bag 92019, Auckland 1042, New Zealand

| % Activity remaining |            |            |            |     | % Activity remaining |            |            |            |     | % Activity remaining |            |            |            |     |
|----------------------|------------|------------|------------|-----|----------------------|------------|------------|------------|-----|----------------------|------------|------------|------------|-----|
| A66                  | PIK75      | TGX221     | IC87114    |     | A66                  | PIK75      | TGX221     | IC87114    |     | A66                  | PIK75      | TGX221     | IC87114    |     |
| 10 $\mu$ M           | 10 $\mu$ M | 10 $\mu$ M | 10 $\mu$ M |     | 10 $\mu$ M           | 10 $\mu$ M | 10 $\mu$ M | 10 $\mu$ M |     | 10 $\mu$ M           | 10 $\mu$ M | 10 $\mu$ M | 10 $\mu$ M |     |
| MKK1                 | 108        | 4          | 84         | 86  | DAPK1                | 81         | 2          | 102        | 110 | PAK4                 | 100        | 8          | 89         | 71  |
| MKK2                 | 116        | 9          | 114        | 105 | CHK1                 | 97         | 76         | 100        | 146 | PAK5                 | 85         | 29         | 86         | 85  |
| MKK6                 | 85         | 55         | 83         | 97  | CHK2                 | 117        | 34         | 105        | 88  | PAK6                 | 93         | 33         | 105        | 91  |
| ERK1                 | 99         | 16         | 103        | 100 | GSK3b                | 95         | 1          | 28         | 98  | MST2                 | 94         | 14         | 101        | 120 |
| ERK2                 | 92         | 42         | 103        | 105 | CDK2-Cycli           | 103        | 2          | 81         | 90  | MST4                 | 99         | 16         | 103        | 100 |
| JNK1                 | 90         | 19         | 102        | 95  | PLK1                 | 112        | 13         | 89         | 92  | GCK                  | 71         | 22         | 121        | 103 |
| JNK2                 | 102        | 62         | 86         | 90  | Aurora A             | 112        | 13         | 102        | 103 | MINK1                | 100        | 6          | 101        | 106 |
| JNK3                 | 106        | 56         | 104        | 101 | Aurora B             | 109        | 38         | 96         | 98  | MEKK1                | 135        | 13         | 92         | 97  |
| p38a MAPK            | 96         | 98         | 92         | 93  | LKB1                 | 105        | 10         | 85         | 89  | MLK1                 | 83         | 26         | 99         | 100 |
| p38b MAPK            | 98         | 62         | 99         | 94  | AMPK                 | 108        | 16         | 98         | 108 | MLK3                 | 99         | 13         | 104        | 93  |
| p38g MAPK            | 90         | 4          | 78         | 100 | MARK1                | 97         | 5          | 94         | 96  | TAO1                 | 97         | 8          | 73         | 90  |
| p38d MAPK            | 95         | 2          | 74         | 93  | MARK2                | 86         | 36         | 105        | 86  | ASK1                 | 93         | 12         | 94         | 94  |
| ERK8                 | 91         | 18         | 102        | 98  | MARK3                | 83         | 2          | 99         | 98  | TAK1                 | 105        | 6          | 88         | 103 |
| RSK1                 | 84         | 3          | 88         | 99  | MARK4                | 87         | 43         | 100        | 103 | IRAK4                | 67         | 23         | 107        | 105 |
| RSK2                 | 99         | 4          | 84         | 113 | BRSK1                | 106        | 70         | 185        | 97  | RIPK2                | 22         | 19         | 76         | 113 |
| PKD1                 | 94         | 22         | 99         | 100 | BRSK2                | 92         | 30         | 78         | 106 | TTK                  | 84         | 15         | 74         | 92  |
| PKBa                 | 97         | 4          | 122        | 103 | MELK                 | 116        | 4          | 96         | 102 | Src                  | 115        | 19         | 84         | 95  |
| PKBb                 | 99         | 70         | 79         | 105 | NUAK1                | 81         | 22         | 77         | 100 | Lck                  | 111        | 6          | 61         | 96  |
| SGK1                 | 88         | 22         | 103        | 108 | CK1                  | 95         | 6          | 86         | 90  | CSK                  | 108        | 22         | 88         | 92  |
| S6K1                 | 98         | 3          | 101        | 104 | CK2                  | 91         | 4          | 82         | 111 | YES1                 | 113        | 19         | 58         | 88  |
| PKA                  | 89         | 4          | 93         | 94  | DYRK1A               | 96         | 0          | 83         | 94  | BTX                  | 96         | 6          | 67         | 105 |
| ROCK 2               | 100        | 2          | 105        | 97  | DYRK2                | 86         | 5          | 89         | 87  | JAK2                 | 95         | 2          | 99         | 88  |
| PRK2                 | 90         | 1          | 82         | 80  | DYRK3                | 83         | -1         | 85         | 97  | SYK                  | 118        | 20         | 101        | 88  |
| PKCa                 | 90         | 15         | 103        | 98  | NEK2a                | 111        | 9          | 94         | 98  | EPH-A2               | 126        | 71         | 76         | 111 |
| PKCz                 | 110        | 39         | 102        | 106 | NEK6                 | 89         | 112        | 95         | 111 | EPH-A4               | 114        | 13         | 63         | 107 |
| PKD1                 | 92         | 36         | 93         | 105 | IKKb                 | 114        | 46         | 91         | 95  | EPH-B1               | 106        | 77         | 99         | 108 |
| MSK1                 | 115        | 11         | 90         | 93  | IKKe                 | 68         | 8          | 86         | 95  | EPH-B2               | 87         | 8          | 84         | 101 |
| MNK1                 | 91         | 87         | 99         | 94  | TBK1                 | 83         | 54         | 93         | 97  | EPH-B3               | 114        | 8          | 115        | 108 |
| MNK2                 | 102        | 47         | 99         | 96  | PIM1                 | 111        | 8          | 76         | 102 | EPH-B4               | 95         | 27         | 73         | 94  |
| MAPKAP-K             | 105        | 19         | 98         | 98  | PIM2                 | 102        | 13         | 87         | 91  | FGF-R1               | 116        | 11         | 86         | 93  |
| MAPKAP-K             | 90         | 96         | 83         | 106 | PIM3                 | 97         | 12         | 64         | 81  | HER4                 | 108        | 13         | 111        | 108 |
| PRAK                 | 85         | 24         | 97         | 98  | SRPK1                | 95         | 83         | 98         | 117 | IGF-1R               | 90         | 7          | 105        | 104 |
| CAMKKb               | 93         | 24         | 102        | 116 | EF2K                 | 94         | 86         | 92         | 65  | IR                   | 108        | 4          | 97         | 96  |
| CAMK1                | 109        | 61         | 92         | 98  | HIPK1                | 88         | 8          | 109        | 89  | IRR                  | 99         | 12         | 85         | 97  |
| SmMLCK               | 81         | 8          | 98         | 94  | HIPK2                | 100        | 4          | 78         | 98  | TrkA                 | 103        | 8          | 70         | 91  |
| PHK                  | 98         | 4          | 87         | 94  | HIPK3                | 92         | 10         | 99         | 97  | VEG-FR               | 97         | 11         | 78         | 93  |
|                      |            |            |            |     | CLK2                 | 20         | 1          | 41         | 89  |                      |            |            |            |     |
|                      |            |            |            |     | PAK2                 | 85         | 14         | 102        | 100 |                      |            |            |            |     |

Figure S1 Activity of kinases after addition of A66, PIK-75, TGX-221 or IC87114

<sup>1</sup> To whom correspondence should be addressed (email peter.shepherd@auckland.ac.nz).

Conflict of interest statement: P.R.S., W.A.D., J.D.K. and G.W.R. have consulted for and own stock in Pathway Therapeutics, a company developing PI3K inhibitors, although none of these compounds are used in the present study.

| Enzyme                   | % Inhibition<br>by 10 $\mu$ M A66 | Enzyme                       | % Inhibition<br>by 10 $\mu$ M A66 | Enzyme                               | % Inhibition<br>by 10 $\mu$ M A66 | Enzyme        | % Inhibition<br>by 10 $\mu$ M A66 |
|--------------------------|-----------------------------------|------------------------------|-----------------------------------|--------------------------------------|-----------------------------------|---------------|-----------------------------------|
| ABL1                     | 14                                | FGFR4                        | 16                                | MYLK2 (skMLCK)                       | -2                                | SYK           | 8                                 |
| ABL1 E255K               | 11                                | FGR                          | 6                                 | NEK1                                 | 18                                | TAOK2 (TAO1)  | 0                                 |
| ABL1 G250E               | 8                                 | FLT1 (VEGFR1)                | 0                                 | NEK2                                 | 10                                | TAOK3 (JIK)   | 3                                 |
| ABL1 T315I               | 8                                 | FLT3                         | 12                                | NEK4                                 | -3                                | TBK1          | -9                                |
| ABL1 Y253F               | 8                                 | FLT3 D835Y                   | 4                                 | NEK6                                 | 2                                 | TEC           | 17                                |
| ABL2 (Arg)               | -3                                | FLT4 (VEGFR3)                | 14                                | NEK7                                 | -6                                | TBK1 (Tie2)   | 19                                |
| ACVR1 (ALK2)             | 47                                | FRAP1 (mTOR)                 | 2                                 | NEK9                                 | -8                                | TGFBF1 (ALK5) | -2                                |
| ACVR1B (ALK4)            | -2                                | FRK (PTK5)                   | 2                                 | NLK                                  | 6                                 | TNK2 (ACK)    | 8                                 |
| ACVR2B                   | -2                                | FYN                          | 6                                 | NTRK1 (TRKA)                         | 14                                | TTK           | -10                               |
| ADRBK1 (GRK2)            | -1                                | GRK4                         | -8                                | NTRK2 (TRKB)                         | 2                                 | TXK           | 1                                 |
| ADRBK2 (GRK3)            | -4                                | GRK5                         | 0                                 | NTRK3 (TRKC)                         | 8                                 | TYK2          | -8                                |
| AKT1 (PKB alpha)         | -1                                | GRK6                         | 8                                 | NUAK1 (ARK5)                         | -18                               | TYRO3 (RSE)   | 5                                 |
| AKT2 (PKB beta)          | -9                                | GRK7                         | 4                                 | PAK1                                 | 2                                 | WEE1          | 6                                 |
| AKT3 (PKB gamma)         | -13                               | GSG2 (Haspin)                | -14                               | PAK2 (PAK65)                         | -1                                | WNK2          | 10                                |
| AMPK A1/B1/G1            | -1                                | GSK3A (GSK3 alpha)           | -6                                | PAK3                                 | 10                                | YES1          | 9                                 |
| AMPK A2/B1/G1            | -3                                | GSK3B (GSK3 beta)            | -1                                | PAK4                                 | 0                                 | ZAK           | 5                                 |
| AURKA (Aurora A)         | -3                                | HCK                          | 3                                 | PAK6                                 | 10                                | ZAP70         | 4                                 |
| AURKB (Aurora B)         | 12                                | HIPK1 (Myak)                 | -12                               | PAK7 (KIAA1264)                      | 11                                |               |                                   |
| AURKC (Aurora C)         | 12                                | HIPK2                        | 4                                 | PASK                                 | 1                                 |               |                                   |
| AXL                      | 14                                | HIPK3 (YAK1)                 | -2                                | PDGFRA (PDGFR alpha)                 | 8                                 |               |                                   |
| BLK                      | 6                                 | HIPK4                        | 30                                | PDGFRA D842V                         | 11                                |               |                                   |
| BMPRI1A (ALK3)           | 12                                | IGF1R                        | -9                                | PDGFRA T674I                         | 3                                 |               |                                   |
| BMX                      | 3                                 | IKBK (IKK beta)              | -1                                | PDGFRA V561D                         | 4                                 |               |                                   |
| BRAF                     | -10                               | IKBKE (IKK epsilon)          | 0                                 | PDGFRB (PDGFR beta)                  | -3                                |               |                                   |
| BRAF V599E               | -13                               | INSR                         | 1                                 | PDK1                                 | -1                                |               |                                   |
| BRAF V599E               | -13                               | INSR (iR)                    | 1                                 | PDK1 Direct                          | -1                                |               |                                   |
| BRK1 (SAD1)              | -4                                | IRAK1                        | -18                               | PHKG1                                | 4                                 |               |                                   |
| BTX                      | -2                                | IRAK4                        | 6                                 | PHKG2                                | -1                                |               |                                   |
| CAMK1 (CaMKI)            | 29                                | ITK                          | -7                                | PI4KA (PI4K alpha)                   | -19                               |               |                                   |
| CAMK1D (CaMKI delta)     | -3                                | JAK1                         | 10                                | PI4KB (PI4K beta)                    | 98                                |               |                                   |
| CAMK2A (CaMKII alpha)    | -2                                | JAK2                         | 19                                | PIK3C2A (PI3K-C2 alpha)              | -2                                |               |                                   |
| CAMK2B (CaMKII beta)     | -4                                | JAK2 JH1 JH2                 | 15                                | PIK3C2B (PI3K-C2 beta)               | 77                                |               |                                   |
| CAMK2D (CaMKII delta)    | -3                                | JAK2 JH1 JH2 V617F           | 3                                 | PIK3C3 (hVPS34)                      | 21                                |               |                                   |
| CAMK4 (CaMKIV)           | -8                                | JAK3                         | 14                                | PIK3CA/PIK3R1 (p110 alpha/p85 alpha) | 96                                |               |                                   |
| CAMKK1 (CAMKKA)          | 2                                 | KDR (VEGFR2)                 | 1                                 | PIK3CD/PIK3R1 (p110 delta/p85 alpha) | 91                                |               |                                   |
| CAMKK2 (CAMKK beta)      | 14                                | KIT                          | 29                                | PIK3CG (p110 gamma)                  | 86                                |               |                                   |
| CDC42 BPA (MRCKA)        | -14                               | KIT T670I                    | 8                                 | PIM1                                 | -4                                |               |                                   |
| CDC42 BPB (MRCKB)        | 7                                 | KIT V654A                    | 8                                 | PIM2                                 | -4                                |               |                                   |
| CDK1/cyclin B            | -1                                | LCK                          | 2                                 | PKN1 (PRK1)                          | -19                               |               |                                   |
| CDK2/cyclin A            | 3                                 | LIMK1                        | 7                                 | PLK1                                 | -3                                |               |                                   |
| CDK5/p25                 | 1                                 | LIMK2                        | 4                                 | PLK2                                 | -24                               |               |                                   |
| CDK5/p35                 | -1                                | LRRK2                        | 35                                | PLK3                                 | 3                                 |               |                                   |
| CDK7/cyclin H/MNAT1      | -20                               | LRRK2 G2019S                 | 56                                | PRKACA (PKA)                         | -2                                |               |                                   |
| CDK8/cyclin C            | 13                                | LTN (TYK1)                   | 17                                | PRKCA (PKC alpha)                    | 2                                 |               |                                   |
| CDK9/cyclin K            | -1                                | LYN A                        | 0                                 | PRKCB1 (PKC beta I)                  | 3                                 |               |                                   |
| CDK9/cyclin T1           | -16                               | LYN B                        | -4                                | PRKCB2 (PKC beta II)                 | -10                               |               |                                   |
| CHEK1 (CHK1)             | 19                                | MAP2K1 (MEK1)                | -3                                | PRKCD (PKC delta)                    | 3                                 |               |                                   |
| CHEK2 (CHK2)             | -3                                | MAP2K1 (MEK1)                | 14                                | PRKCE (PKC epsilon)                  | 9                                 |               |                                   |
| CHUK (IKK alpha)         | 11                                | MAP2K1 (MEK1) S218D S222D    | -6                                | PRKCG (PKC gamma)                    | 6                                 |               |                                   |
| CLK1                     | 27                                | MAP2K2 (MEK2)                | -6                                | PRKCH (PKC eta)                      | 9                                 |               |                                   |
| CLK2                     | 58                                | MAP2K2 (MEK2)                | 10                                | PRKCI (PKC iota)                     | 9                                 |               |                                   |
| CLK3                     | 28                                | MAP2K3 (MEK3)                | -7                                | PRKCN (PKC delta)                    | 7                                 |               |                                   |
| CLK4                     | 87                                | MAP2K6 (MKK6)                | -10                               | PRKCO (PKC theta)                    | 10                                |               |                                   |
| CSF1R (FMS)              | 9                                 | MAP2K6 (MKK6)                | 8                                 | PRKCZ (PKC zeta)                     | 3                                 |               |                                   |
| CSK                      | 7                                 | MAP2K6 (MKK6) S207E T211E    | -7                                | PRKDI (PKC mu)                       | 12                                |               |                                   |
| CSNK1A1 (CK1 alpha 1)    | 0                                 | MAP3K10 (MLK2)               | 10                                | PRKD2 (PKD2)                         | 7                                 |               |                                   |
| CSNK1D (CK1 delta)       | 3                                 | MAP3K11 (MLK3)               | 5                                 | PRKG1                                | -2                                |               |                                   |
| CSNK1E (CK1 epsilon)     | 7                                 | MAP3K14 (NIK)                | 0                                 | PRKG2 (PKG2)                         | -5                                |               |                                   |
| CSNK1G1 (CK1 gamma 1)    | -5                                | MAP3K2 (MEKK2)               | -19                               | PRKX                                 | -3                                |               |                                   |
| CSNK1G2 (CK1 gamma 2)    | 10                                | MAP3K3 (MEKK3)               | -10                               | PTK2 (FAK)                           | 4                                 |               |                                   |
| CSNK1G3 (CK1 gamma 3)    | 3                                 | MAP3K5 (ASK1)                | -5                                | PTK2B (FAK2)                         | 10                                |               |                                   |
| CSNK2A1 (CK2 alpha 1)    | 7                                 | MAP3K7/MAP3K7IP1 (TAK1-TAB1) | -17                               | PTK6 (Brk)                           | 4                                 |               |                                   |
| CSNK2A2 (CK2 alpha 2)    | 1                                 | MAP3K8 (COT)                 | -15                               | RAF1 (RAF) Y340D Y341D               | -4                                |               |                                   |
| DAPK1                    | -37                               | MAP3K9 (MLK1)                | 32                                | RAF1 (RAF) Y340D Y341D               | 14                                |               |                                   |
| DAPK3 (ZIPK)             | 0                                 | MAP4K2 (GCK)                 | 8                                 | RET                                  | 0                                 |               |                                   |
| DCAMK2L (DCK2)           | 0                                 | MAP4K4 (HGK)                 | 11                                | RET V804L                            | -3                                |               |                                   |
| DDR1                     | 3                                 | MAP4K5 (KHS1)                | 10                                | RET Y791F                            | 5                                 |               |                                   |
| DDR2                     | 2                                 | MAPK1 (ERK2)                 | -2                                | RIPK2                                | 66                                |               |                                   |
| DMPK                     | 1                                 | MAPK10 (JNK3)                | -5                                | ROCK1                                | 2                                 |               |                                   |
| DNA-PK                   | 12                                | MAPK11 (p38 beta)            | 8                                 | ROCK2                                | -17                               |               |                                   |
| DYRK1A                   | 14                                | MAPK12 (p38 gamma)           | -5                                | ROS1                                 | 11                                |               |                                   |
| DYRK1B                   | 4                                 | MAPK13 (p38 delta)           | -7                                | RPS6KA1 (RSK1)                       | -1                                |               |                                   |
| DYRK3                    | -12                               | MAPK14 (p38 alpha)           | 15                                | RPS6KA2 (RSK3)                       | -4                                |               |                                   |
| DYRK4                    | -2                                | MAPK14 (p38 alpha) Direct    | 4                                 | RPS6KA3 (RSK2)                       | 1                                 |               |                                   |
| EEF2K                    | -5                                | MAPK3 (ERK1)                 | -10                               | RPS6KA4 (MSK2)                       | -10                               |               |                                   |
| EGFR (ErbB1)             | 0                                 | MAPK8 (JNK1)                 | 14                                | RPS6KA5 (MSK1)                       | -6                                |               |                                   |
| EGFR (ErbB1) L858R       | -3                                | MAPK8 (JNK1)                 | 6                                 | RPS6KA6 (RSK4)                       | 1                                 |               |                                   |
| EGFR (ErbB1) L861Q       | -1                                | MAPK9 (JNK2)                 | 6                                 | RPS6KB1 (p70S6K)                     | 0                                 |               |                                   |
| EGFR (ErbB1) T790M       | 7                                 | MAPK9 (JNK2)                 | 18                                | SGK (SGK1)                           | -3                                |               |                                   |
| EGFR (ErbB1) T790M L858R | 6                                 | MAPKAPK2                     | 2                                 | SGK2                                 | 4                                 |               |                                   |
| EPHA1                    | -1                                | MAPKAPK3                     | 4                                 | SGKL (SGK3)                          | 8                                 |               |                                   |
| EPHA2                    | -3                                | MAPKAPK5 (PRAK)              | -6                                | SLK                                  | 2                                 |               |                                   |
| EPHA3                    | 16                                | MARK1 (MARK)                 | -8                                | SNF1LK2                              | -5                                |               |                                   |
| EPHA4                    | 19                                | MARK2                        | -19                               | SPHK1                                | 10                                |               |                                   |
| EPHA5                    | 2                                 | MARK3                        | -5                                | SPHK2                                | -23                               |               |                                   |
| EPHA7                    | -2                                | MARK4                        | -15                               | SRC                                  | 11                                |               |                                   |
| EPHA8                    | -3                                | MATK (HYL)                   | 0                                 | SRC N1                               | 8                                 |               |                                   |
| EPHB1                    | 2                                 | MELK                         | 11                                | SRMS (Srm)                           | 8                                 |               |                                   |
| EPHB2                    | 4                                 | MERTK (cMER)                 | 1                                 | SRPK1                                | 2                                 |               |                                   |
| EPHB3                    | 0                                 | MET (cMet)                   | 20                                | SRPK2                                | 0                                 |               |                                   |
| EPHB4                    | -9                                | MET M1250T                   | 2                                 | STK16 (PKL12)                        | -4                                |               |                                   |
| ERBB2 (HER2)             | 4                                 | MINK1                        | -3                                | STK17A (DRAK1)                       | 11                                |               |                                   |
| ERBB4 (HER4)             | -10                               | MKNK1 (MNK1)                 | -7                                | STK22B (TSSK2)                       | -12                               |               |                                   |
| FER                      | -10                               | MKNK2 (MNK2)                 | 3                                 | STK22D (TSSK1)                       | -7                                |               |                                   |
| FES (FPS)                | 0                                 | MLCK (MLCK2)                 | 16                                | STK23 (MSSK1)                        | 2                                 |               |                                   |
| FGFR1                    | 1                                 | MST1R (RON)                  | 2                                 | STK24 (MST3)                         | -2                                |               |                                   |
| FGFR2                    | 9                                 | MST4                         | 9                                 | STK25 (YSK1)                         | -1                                |               |                                   |
| FGFR3                    | 18                                | MUSK                         | -9                                | STK3 (MST2)                          | 12                                |               |                                   |
| FGFR3 K650E              | 11                                | MYLK (MLCK)                  | 2                                 | STK33                                | -5                                |               |                                   |
|                          |                                   |                              |                                   | STK4 (MST1)                          | 11                                |               |                                   |

**Legend**  
 < 40% Inhibition  
 40% - 80% Inhibition  
 ≥ 80% Inhibition

Figure S2 Inhibition of kinases by A66

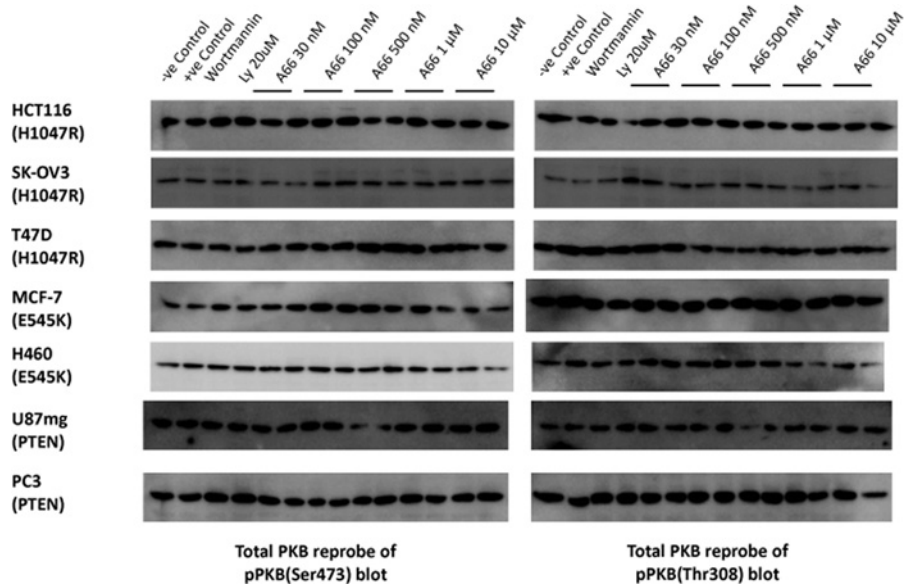

**Figure S3** Reprobes of blots in Figure 3 of the main paper with the total PKB antibody

Ly, LY294002.

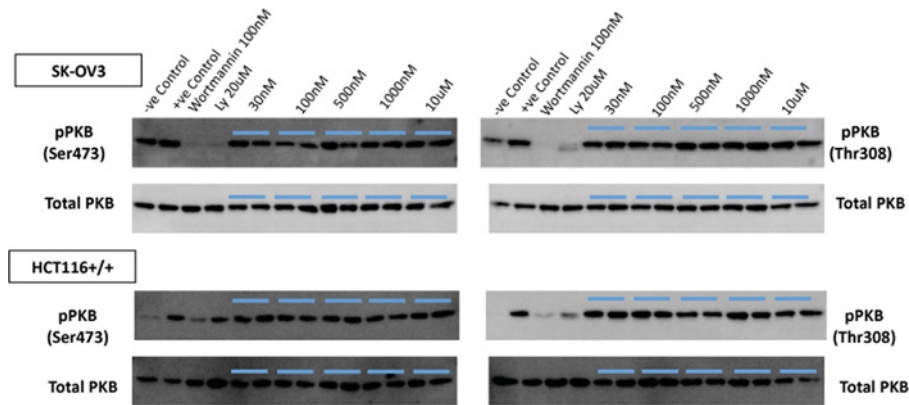

**Figure S4** A66 *R* enantiomer does not block signalling to PKB in cells with the *PIK3CA* H1047R mutation

Experiments were performed as in Figure 3 of the main paper, except that the *R* form of A66 was used. Ly, LY294002.

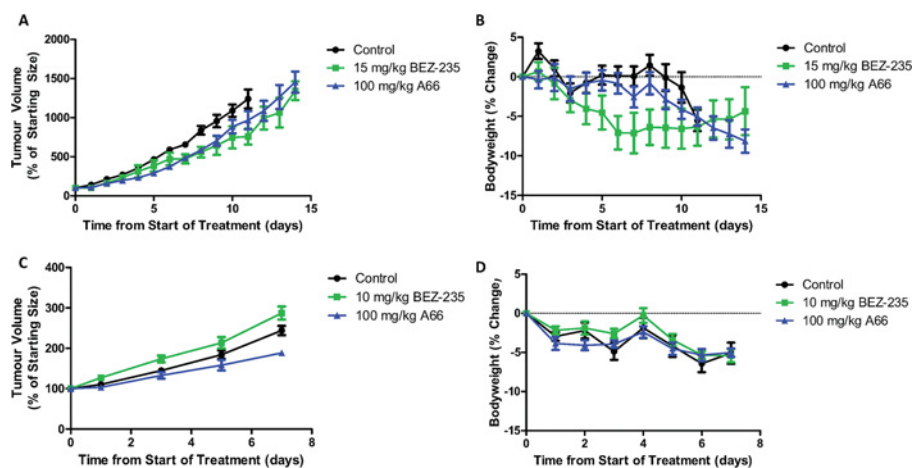

**Figure S5** *In vivo* antitumour efficacy and body weight change following treatment with A66 and BEZ-235 in the U87MG and HCT-116 tumour xenograft models

(A) Average tumour volume and (B) body weight loss during QD  $\times$  14 dosing with 100 mg of A66/kg of body weight and 15 mg of BEZ-235/kg of body weight in mice with U87MG tumours. (C) Average tumour volume and (D) body weight loss during QD  $\times$  7 dosing with 100 mg of A66/kg of body weight and 10 mg of BEZ-235/kg of body weight in mice with HCT-116 tumours. Bars represent the means  $\pm$  S.E.M. for five to seven animals.

Received 17 March 2011/27 May 2011; accepted 14 June 2011

Published as BJ Immediate Publication 14 June 2011, doi:10.1042/BJ20110502
